# Supplementary material for: Refined RIP-seq protocol for epitranscriptome analysis with low input materials
Source: PLoS Biol. 2018 Sep 13;16(9):e2006092. doi: 10.1371/journal.pbio.2006092 (PMC6136692; doi:10.1371/journal.pbio.2006092)
Supplement: S1 Table — MeRIP-seq, m6A RNA immunoprecipitation followed by high-throughput sequencing. (XLSX) [file pbio.2006092.s008.xlsx]

## Sheet: Sheet1
		Refined MeRIP-seq							MeRIP-seq (Control*)
		Input	Synaptic-32µg	NEB-32µg	Millipore-32µg	Milipore-12µg	Millipore-6µg	Millipore-2µg	Input	IP
	Number of all reads	42865581	33778798	34388233	33158971	31898765	31134504	34085954	30852004	29934703
	Input read length	51	51	51	51	51	51	51	50	50
	Mapping Rate
	Uniquely mapped reads number	22567630	24549371	26961236	27490919	26732093	24554292	26386201	26459074	25263909
	% of uniquely mapped reads	0.5265	0.7268	0.784	0.8291	0.838	0.7887	0.7741	0.8576	0.844
	Number of reads mapped to multiple loci	19277472	8675981	6939542	5249397	4754230	6142734	7135468	4305745	3946796
	% of reads mapped to too many loci	0.4497	0.2568	0.2018	0.1583	0.149	0.1973	0.2093	0.1396	0.1318
	Reads Distribution
	% of uniquely mapped reads in protein coding genes	0.9169	0.9338	0.931	0.9238	0.9174	0.936	0.9174	0.9744	0.9652
	% of uniquely mapped reads in lincRNA	0.0296	0.0358	0.0394	0.0477	0.0553	0.038	0.045	0.0044	0.0056
	% of uniquely mapped reads in (rRNA + snRNA + snoRNA)	0.0014	0.00015	0.00013	0.00013	7e-05	5e-05	7e-05	< 0.001%	< 0.001%
	Non-duplication Rate
	no duplication reads	7308099	7879577	6100766	4908685	3498450	4202472	2687201	9645376	1730966
	% of no duplication in uniquely mapped reads	0.3238	0.321	0.2263	0.1786	0.1309	0.1712	0.1018	0.3645	0.0685
	*A549 MeRIP-seq data from published paper: Lin S, Choe J, Du P, Triboulet R, Gregory RI. The m(6)A Methyltransferase METTL3 Promotes Translation in Human Cancer Cells. Mol Cell. 2016;62: 335–345.
