# Supplementary material for: Refined RIP-seq protocol for epitranscriptome analysis with low input materials
Source: PLoS Biol. 2018 Sep 13;16(9):e2006092. doi: 10.1371/journal.pbio.2006092 (PMC6136692; doi:10.1371/journal.pbio.2006092)
Supplement: S2 Table — MeRIP-seq, m6A RNA immunoprecipitation followed by high-throughput sequencing. (XLSX) [file pbio.2006092.s009.xlsx]

## Sheet: Sheet1
		Refined MeRIP-seq (with Replicates)
		Millipore-0.5µg Input rep1	Millipore-0.5µg Input rep2	Millipore-0.5µg IP rep1	Millipore-0.5µg IP rep2
	Number of all reads	50867565	53599267	33560320	31581878
	Input read length	75	75	75	75
	Mapping Rate
	Uniquely mapped reads number	14178354	16285373	26625828	25103885
	% of uniquely mapped reads	0.2787	0.3038	0.7934	0.7949
	Number of reads mapped to multiple loci	33265571	33648607	5089964	4639641
	% of reads mapped to too many loci	0.654	0.6278	0.1517	0.1469
	Reads Distribution
	% uniquely mapped reads in protein coding genes	0.8599	0.8692	0.8881	0.8902
	% uniquely mapped reads in lincRNA	0.0296	0.0295	0.0663	0.0697
	% uniquely mapped reads in (rRNA + snRNA + snoRNA)	0.00215	0.00202	9e-05	0.0001
	Non-duplication Rate
	no duplication reads	8337666	9375805	1702363	1719946
	% of no duplication in uniquely mapped reads	0.5881	0.5757	0.0639	0.0685
