# Supplementary material for: Refined RIP-seq protocol for epitranscriptome analysis with low input materials
Source: PLoS Biol. 2018 Sep 13;16(9):e2006092. doi: 10.1371/journal.pbio.2006092 (PMC6136692; doi:10.1371/journal.pbio.2006092)
Supplement: S3 Table — lincRNA, long intergenic noncoding RNA; m6A, N6-Methyladenosine. (XLSX) [file pbio.2006092.s010.xlsx]

## Sheet: Sheet1
	Protein_coding	# gene with m6A	# peaks	# peaks in 1 exon	# peaks per gene (mean)	# peaks in gene (max)	peaks length (mean)	peaks length (median)
	synaptic_32µg	3619	12173	9141	3.36	27	349.01	249
	neb_32µg	3684	11663	8811	3.17	39	394.64	250
	millipore_32µg	4377	11835	9286	2.7	19	405.41	297
	millipore_12µg	4284	10703	8619	2.5	18	385.6	298
	millipore_6µg	2912	9228	6843	3.17	38	377.97	250
	millipore_2µg	2923	8129	6433	2.78	27	352.86**	250
	Control*	2906	8486	5983	2.92	19	281.94**	200
	lincRNA
	synaptic_32µg	143	283	245	1.98	8	282	243
	neb_32µg	167	309	263	1.85	7	303.56	243
	millipore_32µg	175	330	282	1.89	7	303.15	242.5
	millipore_12µg	151	263	231	1.74	10	287.6	201
	millipore_6µg	109	197	177	1.81	7	288.98	201
	millipore_2µg	71	137	122	1.93	10	289.29	201
	Control*	47	89	83	1.89	8	246.33	199
	* A549 MeRIP-seq data from published paper: Lin S, Choe J, Du P, Triboulet R, Gregory RI. The m(6)A Methyltransferase METTL3 Promotes Translation in Human Cancer Cells. Mol Cell. 2016;62: 335–345.
	** P < 0.001 for the comparison of the peaks length
