# Supplementary material for: Refined RIP-seq protocol for epitranscriptome analysis with low input materials
Source: PLoS Biol. 2018 Sep 13;16(9):e2006092. doi: 10.1371/journal.pbio.2006092 (PMC6136692; doi:10.1371/journal.pbio.2006092)
Supplement: S4 Table — m6A, N6-Methyladenosine; MeRIP-seq, m6A RNA immunoprecipitation followed by high-throughput sequencing. (XLSX) [file pbio.2006092.s011.xlsx]

## Sheet: Sheet1
		Control	synaptic_32ug	millipore_32ug	millpore_2ug	millipore32ug_uniqe (vs control)	millipore2ug_uniqe (vs control*)
	Number of MeRIP-seq peaks	8670	12086	12231	8564	8808	5100
	Number of peaks with	2157	2653	3056	2325	1704	1038
	miCLIP sites*
	% of peaks with miCLIP sites	0.199	0.2311	0.2913	0.219	0.1327	0.0807
	Number of peaks with predicted single base m6A sites*	7436	9828	10181	7414	7101	4288
	% of peaks with predicted	0.8577	0.8132	0.8324	0.8657	0.8062	0.8408
	single base m6A sites
	* Control MeRIP-seq data from published paper: Lin S, Choe J, Du P, Triboulet R, Gregory RI. The m(6)A Methyltransferase METTL3 Promotes Translation in Human Cancer Cells. Mol Cell. 2016;62: 335–345; miCIP sites data from publisehd paper: Linder B, Grozhik AV, Olarerin-George AO, Meydan C, Mason CE, Jaffrey SR. Single-nucleotide-resolution mapping of m6A and m6Am throughout the transcriptome. Nat…
