# Supplementary material for: Refined RIP-seq protocol for epitranscriptome analysis with low input materials
Source: PLoS Biol. 2018 Sep 13;16(9):e2006092. doi: 10.1371/journal.pbio.2006092 (PMC6136692; doi:10.1371/journal.pbio.2006092)
Supplement: S5 Table — MeRIP-seq, m6A RNA immunoprecipitation followed by high-throughput sequencing. (XLSX) [file pbio.2006092.s012.xlsx]

## Sheet: Sheet1
			All (human + E. coli K-12)		ERCC (E. coli K-12)
			Uniquely mapped	no duplication	Uniquely mapped	no duplication
						(subsampling)
	Tumor1	Input	58076737	31372338	34348	986
		IP	52551126	6687095	24098	1701
	Tumor2	Input	47884110	27239732	23719	934
		IP	58807376	14326022	16451	1108
